# Supplementary material for: Automatic identification of angiogenesis in double stained images of liver tissue
Source: PubMed Central journal article supplement (PMC3226185; doi:10.1186/1471-2105-10-s11-s13), 2009-10-08

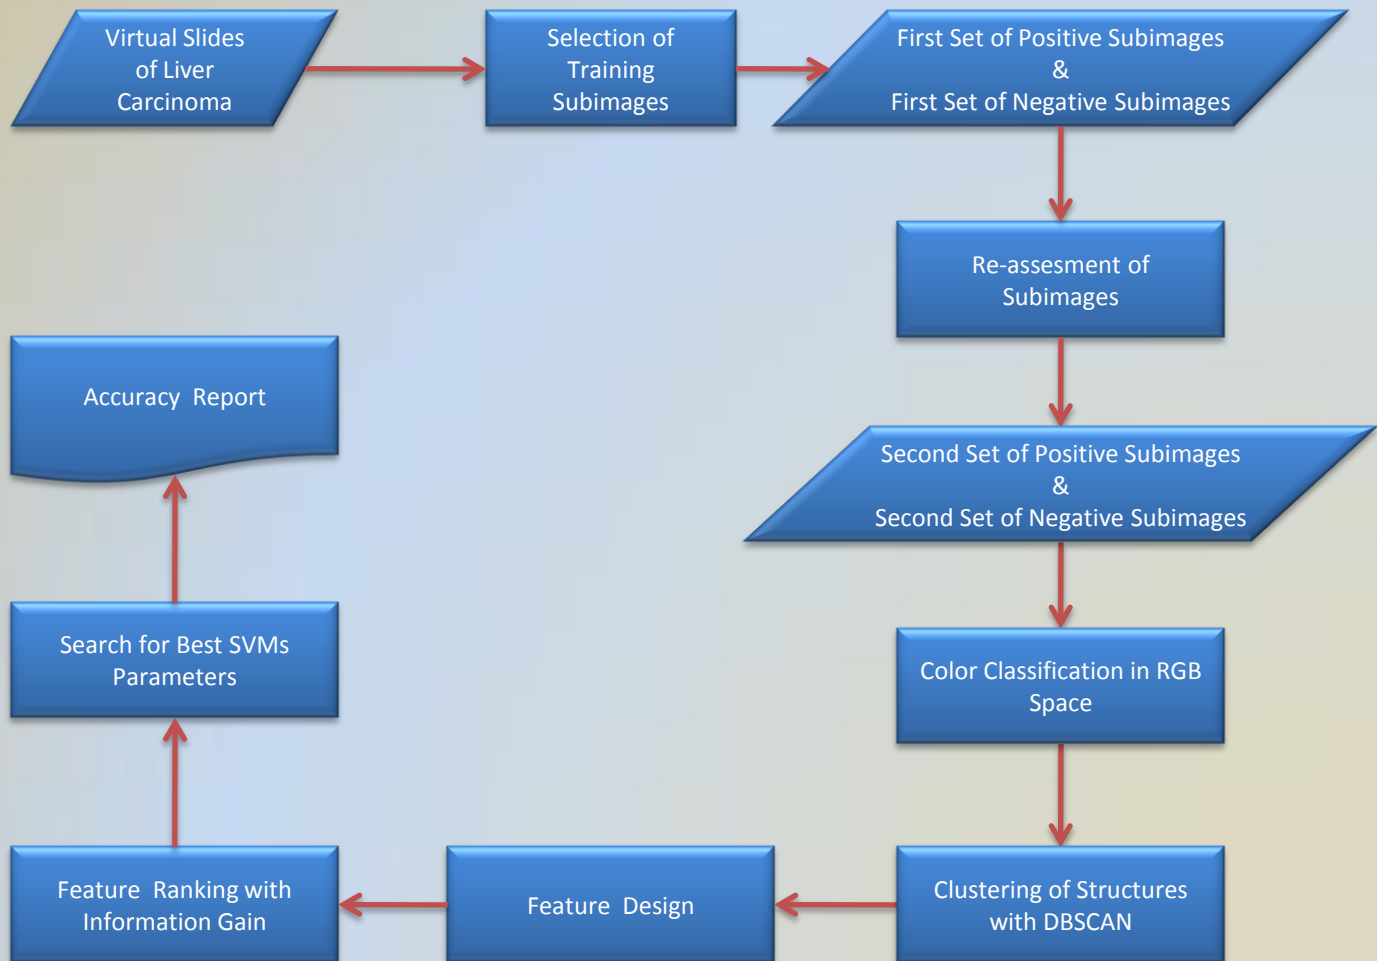

Supplement: 1471-2105-10-S11-S13-S2.pdf [file 1471-2105-10-S11-S13-S2.pdf]
